# Supplementary material
Source: Springer Nature journal article supplement (https://www.springermedizin.de/resource/supplementary/12885_2014_5176_MOESM4_ESM.pdf/9468398)

HCC70

1806

MDA231

GPR30

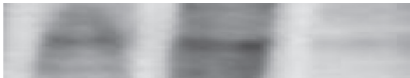

Actin

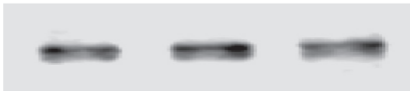

rel.  
expr.

0.85

1.0

0.26

Supplement: MOESM4 [file 9468398]
